# Supplementary material for: Dopaminergic contributions to behavioral control under threat of punishment in rats
Source: PubMed Central journal article supplement (PMC7239833; doi:10.1007/s00213-020-05497-w), 2020-03-27
Supplement: 213_2020_5497_MOESM1_ESM.pdf [file 213_2020_5497_MOESM1_ESM.pdf]

## Online Resources

### Dopaminergic contributions to behavioral control under threat of punishment in rats

Jeroen P.H. Verharen<sup>1,2,3</sup>, Mienieke C.M. Luijendijk<sup>1</sup>, Louk J.M.J. Vanderschuren<sup>2,5</sup>, Roger A.H. Adan<sup>1,4,5,\*</sup>

<sup>1</sup> Brain Center Rudolf Magnus, Department of Translational Neuroscience, University Medical Center Utrecht, Utrecht, The Netherlands.

<sup>2</sup> Department of Animals in Science and Society, Division of Behavioural Neuroscience, Faculty of Veterinary Medicine, Utrecht University, Utrecht, The Netherlands.

<sup>3</sup> Helen Wills Neuroscience Institute, Department of Molecular and Cell Biology, University of California Berkeley, Berkeley, CA 94720, United States

<sup>4</sup> Institute of Physiology and Neuroscience, Sahlgrenska Academy at the University of Gothenburg, Gothenburg, Sweden.

<sup>5</sup> These authors contributed equally.

\* Corresponding author: [r.a.h.adan@umcutrecht.nl](mailto:r.a.h.adan@umcutrecht.nl), +31-88-7568810

## Online Resource 1

### Supplementary statistics table

| Figure          | Parameter                  | n                              | Test                                 | Test statistic                                                                                                                                | P value        | Significance |
|-----------------|----------------------------|--------------------------------|--------------------------------------|-----------------------------------------------------------------------------------------------------------------------------------------------|----------------|--------------|
| 2e              | dF/F change                | 6 rats                         | 1-way repeated measures ANOVA        | F (1.722, 8.609) = 14.69                                                                                                                      | p = 0.0021     | **           |
|                 | No stim vs Stim-Success    | 6 rats                         | Paired t-test, Bonferroni correction | t(5) = 0.3438                                                                                                                                 | p > 0.999      |              |
|                 | No stim vs Stim-Shock      | 6 rats                         | Paired t-test, Bonferroni correction | t(5) = 5.190                                                                                                                                  | p = 0.0105     | *            |
|                 | Stim-Success vs Stim-Shock | 6 rats                         | Paired t-test, Bonferroni correction | t(5) = 5.271                                                                                                                                  | p = 0.0098     | **           |
| 3b, left panel  | Whole graph                | 6 rats (Cre+)<br>9 rats (Cre-) | 2-way repeated measures ANOVA        | Main time effect:<br>F(9,117) = 3.538<br><br>Main effect genotype:<br>F(1,13) = 47.26<br><br>Genotype * time interaction:<br>F(9,117) = 9.802 | All p < 0.0001 | ****         |
| 3b, right panel | Whole graph                | 6 rats (Cre+)<br>9 rats (Cre-) | Unpaired t-test                      | t(13) = 8.162                                                                                                                                 | p < 0.0001     | ****         |
| 3c              | Stim - Reward taken        | 6 rats                         | Paired t-test                        | t(5) = 1.151                                                                                                                                  | p = 0.3019     |              |
|                 | Stim - Omitted             | 6 rats                         | Paired t-test                        | t(5) = 1.151                                                                                                                                  | p = 0.3019     |              |
|                 | NoStim - Success           | 6 rats                         | Paired t-test                        | t(5) = 0.7906                                                                                                                                 | p = 0.4650     |              |
|                 | NoStim - Shock             | 6 rats                         | Paired t-test                        | t(5) = 0.6984                                                                                                                                 | p = 0.5160     |              |
|                 | NoStim - Omitted           | 6 rats                         | Paired t-test                        | t(5) = 0.5096                                                                                                                                 | p = 0.6320     |              |
|                 | Shock index                | 6 rats                         | Paired t-test                        | t(5) = 0.7130                                                                                                                                 | p = 0.5077     |              |
|                 | Latency NoStim             | 6 rats                         | Paired t-test                        | t(5) = 1.387                                                                                                                                  | p = 0.2240     |              |
|                 | Latency Stim - Success     | 6 rats                         | Paired t-test                        | t(5) = 1.550                                                                                                                                  | p = 0.1819     |              |
|                 | Latency Stim - Shock       | 6 rats                         | Paired t-test                        | t(5) = 0.0525                                                                                                                                 | p = 0.9602     |              |
| 3d              | Stim - Reward taken        | 6 rats                         | Paired t-test                        | t(5) = 0.4218                                                                                                                                 | p = 0.6907     |              |
|                 | Stim - Omitted             | 6 rats                         | Paired t-test                        | t(5) = 0.4218                                                                                                                                 | p = 0.6907     |              |
|                 | NoStim - Success           | 6 rats                         | Paired t-test                        | t(5) = 0.4021                                                                                                                                 | p = 0.7042     |              |
|                 | NoStim - Shock             | 6 rats                         | Paired t-test                        | t(5) = 0.8885                                                                                                                                 | p = 0.4150     |              |

| Figure   | Parameter              | n                                                                                                        | Test          | Test statistic                                                                                                                                           | P value                                                                                                                                     | Significance |
|----------|------------------------|----------------------------------------------------------------------------------------------------------|---------------|----------------------------------------------------------------------------------------------------------------------------------------------------------|---------------------------------------------------------------------------------------------------------------------------------------------|--------------|
|          | NoStim - Omitted       | 6 rats                                                                                                   | Paired t-test | t(5) = 0.5505                                                                                                                                            | p = 0.6057                                                                                                                                  |              |
|          | Shock index            | 6 rats                                                                                                   | Paired t-test | t(5) = 0.6041                                                                                                                                            | p = 0.5721                                                                                                                                  |              |
|          | Latency NoStim         | 6 rats                                                                                                   | Paired t-test | t(5) = 1.314                                                                                                                                             | p = 0.2460                                                                                                                                  |              |
|          | Latency Stim - Success | 6 rats                                                                                                   | Paired t-test | t(5) = 0.9701                                                                                                                                            | p = 0.3766                                                                                                                                  |              |
|          | Latency Stim - Shock   | 5 rats                                                                                                   | Paired t-test | t(4) = 2.651                                                                                                                                             | p = 0.0569                                                                                                                                  |              |
|          |                        | One animal had no Stim-Shock trials after saline injection, so was excluded from statistical comparison  |               |                                                                                                                                                          |                                                                                                                                             |              |
| 4b       | c-Fos density NAc      | 8 vs 8 rats                                                                                              | Two-way ANOVA | Main effect group<br>F(1,42) = 6.40<br><br>Main effect brain regions<br>F(2,42) = 1.51<br><br>Group * brain region interaction effect<br>F(2,42) = 0.31  | Main effect group<br>p = 0.0153<br><br>Main effect brain regions<br>p = 0.2332<br><br>Group * brain region interaction effect<br>p = 0.7353 | *            |
| 4c       | c-Fos density vmPFC    | 8 vs 7 rats                                                                                              | Two-way ANOVA | Main effect group<br>F(1,26) = 0.91<br><br>Main effect brain regions<br>F(1,26) = 4.17<br><br>Group * brain region interaction effect<br>F(1,26) = 1.38/ | Main effect group<br>p = 0.3500<br><br>Main effect brain regions<br>p = 0.0515<br><br>Group * brain region interaction effect<br>p = 0.2507 |              |
|          |                        | For one animal from the no-stimulus group, no PFC slices could be retrieved.                             |               |                                                                                                                                                          |                                                                                                                                             |              |
| 5a       | Stim - Reward taken    | 18 rats                                                                                                  | Paired t-test | t(17) = 2.601                                                                                                                                            | p = 0.0186                                                                                                                                  | *            |
|          | Stim - Omitted         | 18 rats                                                                                                  | Paired t-test | t(17) = 2.601                                                                                                                                            | p = 0.0186                                                                                                                                  | *            |
|          | NoStim - Success       | 18 rats                                                                                                  | Paired t-test | t(17) = 2.857                                                                                                                                            | p = 0.0109                                                                                                                                  | *            |
|          | NoStim - Shock         | 18 rats                                                                                                  | Paired t-test | t(17) = 4.448                                                                                                                                            | p = 0.0004                                                                                                                                  | ***          |
|          | NoStim - Omitted       | 18 rats                                                                                                  | Paired t-test | t(17) = 1.643                                                                                                                                            | p = 0.1188                                                                                                                                  |              |
|          | Shock index            | 18 rats                                                                                                  | Paired t-test | t(17) = 5.003                                                                                                                                            | p = 0.0001                                                                                                                                  | ***          |
|          | Latency NoStim         | 18 rats                                                                                                  | Paired t-test | t(17) = 1.439                                                                                                                                            | p = 0.1683                                                                                                                                  |              |
|          | Latency Stim - Success | 18 rats                                                                                                  | Paired t-test | t(17) = 0.7419                                                                                                                                           | p = 0.4683                                                                                                                                  |              |
|          | Latency Stim - Shock   | 16 rats                                                                                                  | Paired t-test | t(15) = 0.5158                                                                                                                                           | p = 0.6135                                                                                                                                  |              |
|          |                        | Two animals had no Stim-Shock trials after saline infusion, so were excluded from statistical comparison |               |                                                                                                                                                          |                                                                                                                                             |              |
| 5b (top) | Stim - Reward taken    | 7 rats                                                                                                   | Paired t-test | t(6) = 2.027                                                                                                                                             | p = 0.0891                                                                                                                                  |              |

| Figure         | Parameter              | n                                                                                                      | Test          | Test statistic | P value    | Significance |
|----------------|------------------------|--------------------------------------------------------------------------------------------------------|---------------|----------------|------------|--------------|
|                | Stim - Omitted         | 7 rats                                                                                                 | Paired t-test | t(6) = 2.027   | p = 0.0891 |              |
|                | NoStim - Success       | 7 rats                                                                                                 | Paired t-test | t(6) = 1.457   | p = 0.1954 |              |
|                | NoStim - Shock         | 7 rats                                                                                                 | Paired t-test | t(6) = 0.7947  | p = 0.4571 |              |
|                | NoStim - Omitted       | 7 rats                                                                                                 | Paired t-test | t(6) = 2.502   | p = 0.0464 | *            |
|                | Shock index            | 7 rats                                                                                                 | Paired t-test | t(6) = 0.1675  | p = 0.8725 |              |
|                | Latency NoStim         | 7 rats                                                                                                 | Paired t-test | t(6) = 2.435   | p = 0.0508 |              |
|                | Latency Stim - Success | 7 rats                                                                                                 | Paired t-test | t(6) = 2.627   | p = 0.0392 | *            |
|                | Latency Stim - Shock   | 7 rats                                                                                                 | Paired t-test | t(6) = 2.443   | p = 0.0503 |              |
| 5b<br>(bottom) | Stim - Reward taken    | 7 rats                                                                                                 | Paired t-test | t(6) = 2.085   | p = 0.0821 |              |
|                | Stim - Omitted         | 7 rats                                                                                                 | Paired t-test | t(6) = 2.085   | p = 0.0821 |              |
|                | NoStim - Success       | 7 rats                                                                                                 | Paired t-test | t(6) = 2.540   | p = 0.0441 | *            |
|                | NoStim - Shock         | 7 rats                                                                                                 | Paired t-test | t(6) = 4.368   | p = 0.0047 | **           |
|                | NoStim - Omitted       | 7 rats                                                                                                 | Paired t-test | t(6) = 1.947   | p = 0.0994 |              |
|                | Shock index            | 7 rats                                                                                                 | Paired t-test | t(6) = 4.208   | p = 0.0056 | **           |
|                | Latency NoStim         | 7 rats                                                                                                 | Paired t-test | t(6) = 0.7745  | p = 0.4681 |              |
|                | Latency Stim - Success | 7 rats                                                                                                 | Paired t-test | t(6) = 2.460   | p = 0.0491 | *            |
|                | Latency Stim - Shock   | 6 rats                                                                                                 | Paired t-test | t(5) = 0.3608  | p = 0.7330 |              |
|                |                        | One animal had no Stim-Shock trials after saline infusion, so was excluded from statistical comparison |               |                |            |              |

**Online Resource 2**  
**Supplementary to Figure 4**  
**cFos expression versus shocks received**

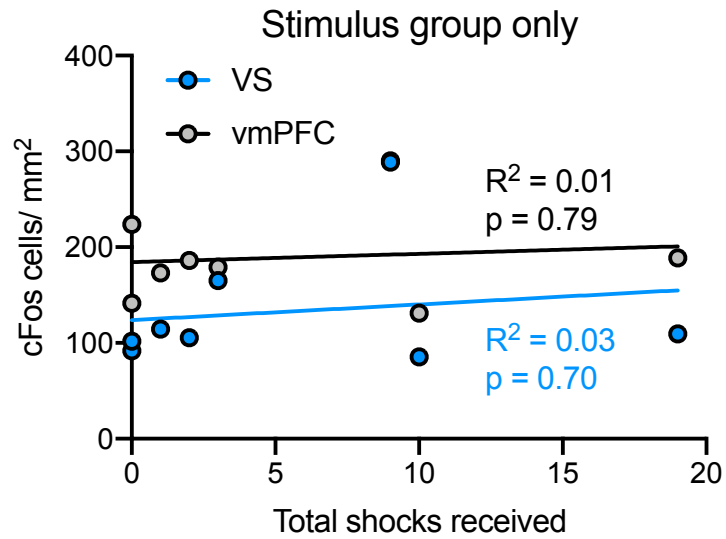

The number of shocks the animals in the stimulus group received did not correlate with *cFos* density in VS or vmPFC.
